# Supplementary material for: Initial stage of titanium oxidation in Ti/CuO thermites: a molecular dynamics study using ReaxFF forcefields
Source: Royal Society of Chemistry journal article supplement (doi:10.1039/d3cp00032j), 2023-01-01
Supplement: d3cp00032j1.pdf [file d3cp00032j1.pdf]

## Electronic Supplementary Information

### Initial Stage of Titanium Oxidation in Ti/CuO Thermites: a Molecular Dynamics Study using ReaxFF Forcefield

Hicham Jabraoui<sup>a</sup>, Alain Estève<sup>a</sup>, Sungwook Hong<sup>b</sup>, Carole Rossi<sup>a, †</sup>

a. LAAS-CNRS, University of Toulouse, 31077 Toulouse, France

b. Department of Physics and Engineering, California State University, Bakersfield, Bakersfield, California 93311, United States of America

† Corresponding Author Carole Rossi E-mail: rossi@laas.fr

#### SI. 1. NEB CALCULATIONS FOR OXYGEN DIFFUSION

Here we combine minimization using Damped Dynamics (DD) method<sup>1</sup> and Climbing image-nudged elastic band (CI-NEB) calculations<sup>2</sup> implemented in LAMMPS packages<sup>3</sup> to compute oxygen diffusion barrier energy in CuO materials. By comparing the value obtained by ReaxFF and our previous DFT calculations<sup>4</sup>, our main objective is to check if the ReaxFF parameters used allow studying the nanothermite ignition context. For a reasonable comparison, we put the two approaches namely DFT/CI-NEB and minimization energy/CI-NEB under the same conditions using the same number of images between the initial and final state on the diffusion channels. oxygen and the same structure CuO, see the detail of the CuO structure in our previous DFT calculations **Ref**<sup>4</sup>. Two approaches show that CuO bulk diffusion (either as a Frenkel defect or as an interstitial) is not possible at low temperature (below 600 K), since the barrier energy of this diffusion is higher than 3 eV (see **Figure S1 a**). ReaxFF reports an almost similar barrier energy of diffusion oxygen in perfect CuO with a value at around 4 eV. This means that the presence of an oxygen vacancy is necessary to reasonably activate the diffusion of oxygen during the deoxygenation of CuO and its decomposition during the ignition of nanothermite. In the presence of oxygen vacancy, DFT has previously reported that oxygen diffusion via the oxygen vacancy in bulk CuO can only be feasible in two favorable crystallographic orientations, namely [110] and [001]. Similar to what is obtained with DFT, ReaxFF approach shows a barrier energy less than 2 eV, while compared to DFT calculations for [110], ReaxFF is overestimating the barrier. Note also that for the [001] direction, ReaxFF is underestimating the barrier (see **Figure S1 b**). Coming from the bulk towards the layers close to the surface, ReaxFF shows that the oxygen diffusion barrier energy decreases along two favorable crystallographic directions, by around 0.2 eV (see **Figure S1 c**). On both surfaces, namely (001) and (111), preoxy diffusion results in a barrier energy of about 2 (eV) (see **Figure S1 d**). Compared to DFT calculations, ReaxFF gives an overestimated barrier energy onto the surface (001) and an underestimated barrier energy onto the (111) surface. Generating an O<sub>2</sub> molecule from the surface, ReaxFF shows a formation energy of 7.11 eV ) from the (111) (6.88 eV for DFT) surface and 0.28 eV from the (001) surface (1.53 eV for DFT). On the surface (001),

ReaxFF shows a shift with DFT which can be correlated by the fact that with DFT the (001) surface is strongly reconstructed whereas with the minimization energy in the ReaxFF framework this reconstruction is less pronounced.

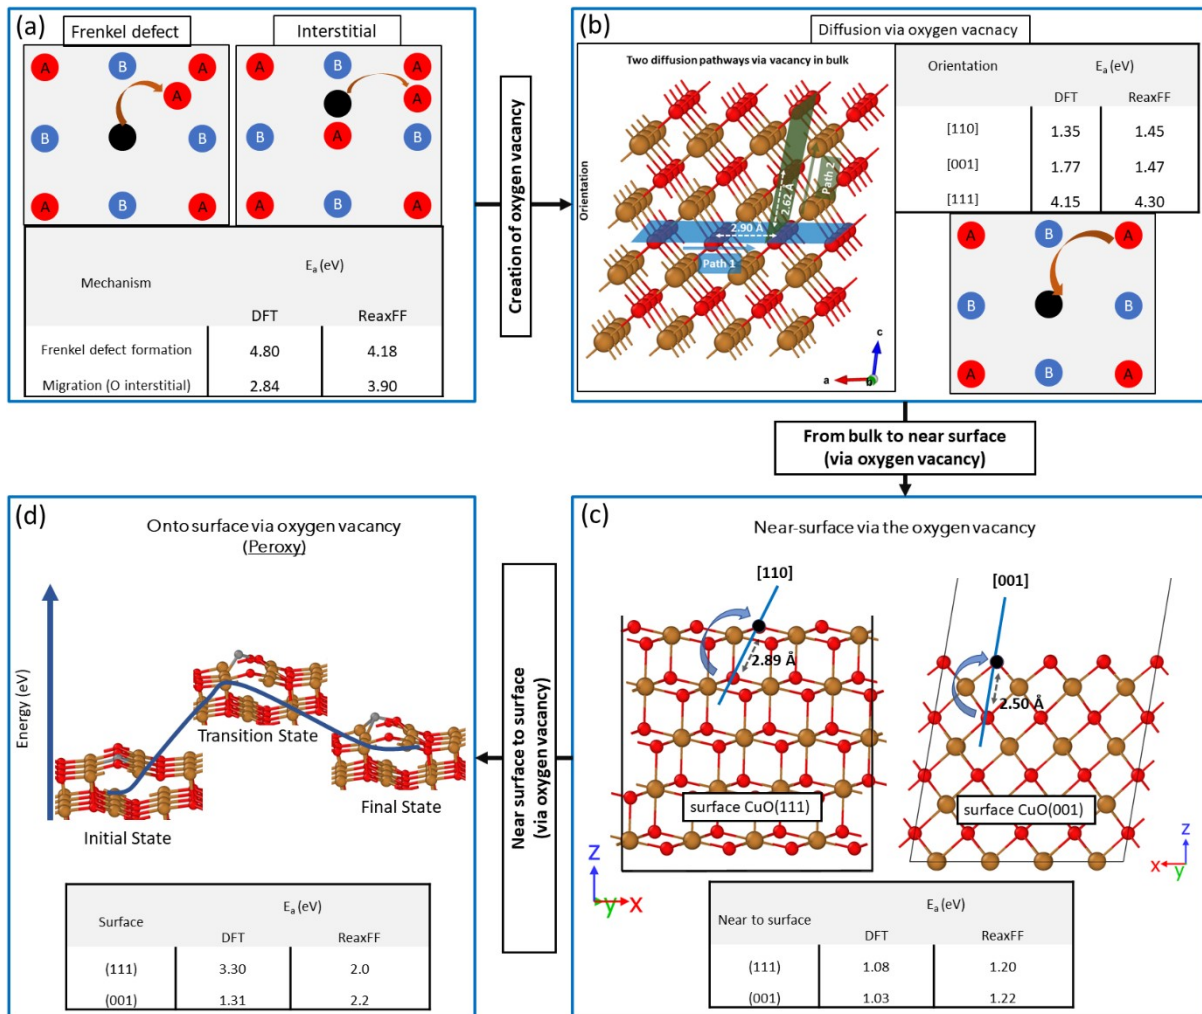

**Figure S1.** Oxygen diffusion pathways in CuO at different levels, (a) into bulk without defect, (b) into bulk via oxygen vacancy in two favorable crystallographic orientations, (c) near surface via vacancy oxygen and (d) onto the surface as peroxy. The red and light brown balls represent oxygen and copper atoms, respectively.

### SII. Ti/CuO DETAILS

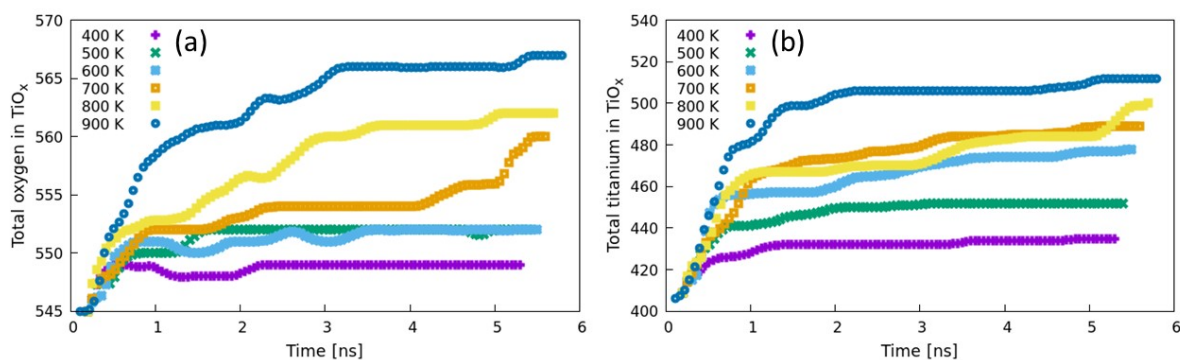

**Figure S2.** (a-b) The temporal evolution of the total amount of oxygen and the total amount of titanium in the  $\text{TiO}_x$  region over annealing simulation times at different temperatures, respectively.

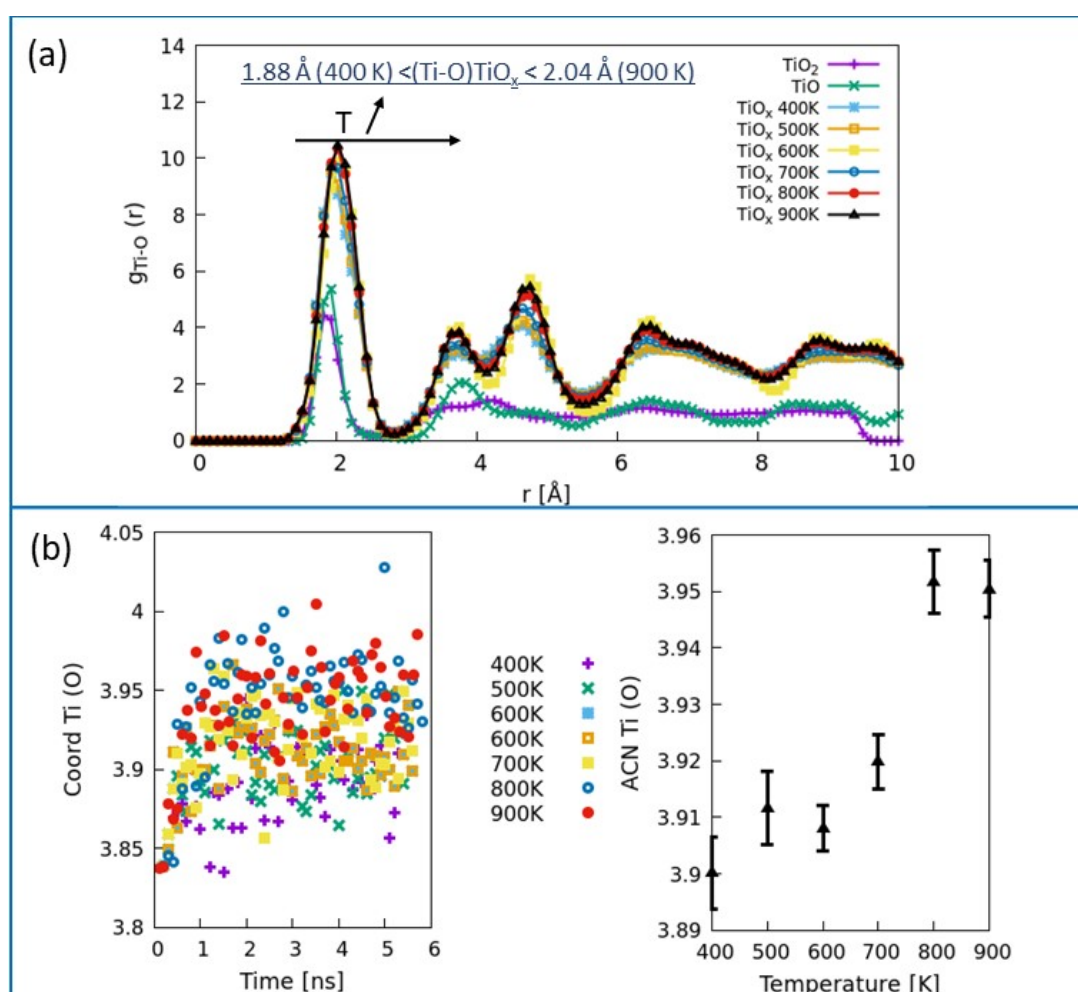

**Figure S3.** (a-b) Radial distribution function (RDF) of Ti-O and the average coordination number (ACN) of Ti with respect to O in pristine  $\text{TiO}$ , pristine  $\text{TiO}_2$  and the newly created  $\text{TiO}_x$  at different temperatures, respectively. ACN and RDF were determined over the last 1 ns of 5 ns of annealing.

### SIII. Al/CuO DETAILS

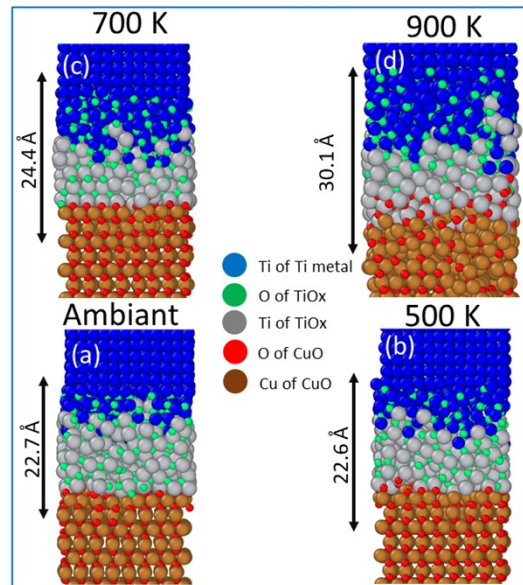

**Figure S4.** (a-d) represent two-dimensional snapshots of the initial (pre-annealed) and final (post-annealed) structures of Al/*am*Al<sub>x</sub>O<sub>y</sub>/CuO at different selected temperatures (ambient, 500, 700, and 900 K), respectively. Noteworthy, Defective CuO is considered in this study.

**Table S1.** The total Al<sub>x</sub>O<sub>y</sub> thickness, its depth extension into the Al metallic fuel region and into the CuO region, and its Stoichiometry as a function of temperature. Average values were computed over the last 100 ps of 5 ns of annealing.

| T (K)   | Al <sub>x</sub> O <sub>y</sub> thickness<br>(Å) | Al <sub>x</sub> O <sub>y</sub><br>into metal Al (Å) | Al <sub>x</sub> O <sub>y</sub><br>into CuO (Å) | Al <sub>x</sub> O <sub>y</sub><br>Stoichiometry |
|---------|-------------------------------------------------|-----------------------------------------------------|------------------------------------------------|-------------------------------------------------|
| Ambiant | 22.74                                           | 0                                                   | 0                                              | Al <sub>2.8</sub> O <sub>3</sub>                |
| 400     | 22.82 ± 0.02                                    | 0.20 ± 0.01                                         | 0.01 ± 0.02                                    | Al <sub>2.9</sub> O <sub>3</sub>                |
| 500     | 22.86 ± 0.02                                    | 0.22 ± 0.01                                         | 0.07 ± 0.01                                    | Al <sub>2.7</sub> O <sub>3</sub>                |
| 600     | 23.87 ± 0.02                                    | 1.21 ± 0.01                                         | 0.07 ± 0.04                                    | Al <sub>3.5</sub> O <sub>3</sub>                |
| 700     | 25.05 ± 0.07                                    | 2.20 ± 0.02                                         | 0.12 ± 0.02                                    | Al <sub>3.6</sub> O <sub>3</sub>                |
| 800     | 26.40 ± 0.02                                    | 2.93 ± 0.01                                         | 0.80 ± 0.07                                    | Al <sub>3.6</sub> O <sub>3</sub>                |
| 900     | 30.10 ± 0.07                                    | 4.34 ± 0.03                                         | 3.00 ± 0.07                                    | Al <sub>3.6</sub> O <sub>3</sub>                |

#### SIV. REAXFF PARAMETERS

Reactive MD-force field: H/O/Si/Al/Cu, G.M. Psogiannakis et al., J. Phys. Chem. C, 2015, 119 (12), pp 6678-6686, <http://dx.doi.org/10.1021/acs.jpcc.5b00699>; add TiO2 from Sung-Yup Kim and Adri C. T. van Duin, 2013, <http://dx.doi.org/10.1021/jp4031943>

39 ! Number of general parameters  
50.0000 !Overcoordination parameter  
9.5469 !Overcoordination parameter  
26.5405 !Valency angle conjugation parameter  
1.7224 !Triple bond stabilisation parameter  
6.8702 !Triple bond stabilisation parameter  
60.4850 !C2-correction  
1.0588 !Undercoordination parameter  
4.6000 !Triple bond stabilisation parameter  
12.1176 !Undercoordination parameter  
13.3056 !Undercoordination parameter  
-70.5044 !Triple bond stabilization energy  
0.0000 !Lower Taper-radius  
10.0000 !Upper Taper-radius  
2.8793 !Not used  
33.8667 !Valency undercoordination  
6.0891 !Valency angle/lone pair parameter  
1.0563 !Valency angle  
2.0384 !Valency angle parameter  
6.1431 !Not used  
6.9290 !Double bond/angle parameter  
0.3989 !Double bond/angle parameter: overcoord  
3.9954 !Double bond/angle parameter: overcoord  
-2.4837 !Not used

5.7796 !Torsion/BO parameter  
 10.0000 !Torsion overcoordination  
 1.9487 !Torsion overcoordination  
 -1.2327 !Conjugation 0 (not used)  
 2.1645 !Conjugation  
 1.5591 !vdWaals shielding  
 0.1000 !Cutoff for bond order (\*100)  
 2.1365 !Valency angle conjugation parameter  
 0.6991 !Overcoordination parameter  
 50.0000 !Overcoordination parameter  
 1.8512 !Valency/lone pair parameter  
 0.5000 !Not used  
 20.0000 !Not used  
 5.0000 !Molecular energy (not used)  
 0.0000 !Molecular energy (not used)  
 2.6962 !Valency angle conjugation parameter  
 16 ! Nr of atoms; cov.r; valency;a.m;Rvdw;Evdw;gammaEEM;cov.r2;#  
     alfa;gammavdW;valency;Eunder;Eover;chiEEM;etaEEM;n.u.  
     cov r3;Elp;Heat inc.;n.u.;n.u.;n.u.;n.u.  
     ov/un;val1;n.u.;val3,vval4  
 C 1.3817 4.0000 12.0000 1.8903 0.1838 0.9000 1.1341 4.0000  
   9.7559 2.1346 4.0000 34.9350 79.5548 5.9666 7.0000 0.0000  
   1.2114 0.0000 202.5551 8.9539 34.9289 13.5366 0.8563 0.0000  
   -2.8983 2.5000 1.0564 4.0000 2.9663 0.0000 0.0000 0.0000  
 H 0.8930 1.0000 1.0080 1.3550 0.0930 0.8203 -0.1000 1.0000  
   8.2230 33.2894 1.0000 0.0000 121.1250 3.7248 9.6093 1.0000  
   -0.1000 0.0000 61.6606 3.0408 2.4197 0.0003 1.0698 0.0000  
   -19.4571 4.2733 1.0338 1.0000 2.8793 0.0000 0.0000 0.0000  
 O 1.2450 2.0000 15.9990 2.3890 0.1000 1.0898 1.0548 6.0000  
   9.7300 13.8449 4.0000 37.5000 116.0768 8.5000 8.3122 2.0000  
   0.9049 0.4056 59.0626 3.5027 0.7640 0.0021 0.9745 0.0000

|    |          |         |          |          |          |         |         |         |
|----|----------|---------|----------|----------|----------|---------|---------|---------|
|    | -3.5500  | 2.9000  | 1.0493   | 4.0000   | 2.9225   | 0.0000  | 0.0000  | 0.0000  |
| N  | 1.2333   | 3.0000  | 14.0000  | 1.9324   | 0.1376   | 0.8596  | 1.1748  | 5.0000  |
|    | 10.0667  | 7.8431  | 4.0000   | 32.2482  | 100.0000 | 6.8418  | 6.3404  | 2.0000  |
|    | 1.0433   | 13.7673 | 119.9837 | 2.1961   | 3.0696   | 2.7683  | 0.9745  | 0.0000  |
|    | -4.3875  | 2.6192  | 1.0183   | 4.0000   | 2.8793   | 0.0000  | 0.0000  | 0.0000  |
| S  | 1.9405   | 2.0000  | 32.0600  | 2.0677   | 0.2099   | 1.0336  | 1.5479  | 6.0000  |
|    | 9.9575   | 4.9055  | 4.0000   | 52.9998  | 112.1416 | 6.5000  | 8.2545  | 2.0000  |
|    | 1.4601   | 9.7177  | 71.1843  | 5.7487   | 23.2859  | 12.7147 | 0.9745  | 0.0000  |
|    | -11.0000 | 2.7466  | 1.0338   | 6.2998   | 2.8793   | 0.0000  | 0.0000  | 0.0000  |
| Si | 2.0175   | 4.0000  | 28.0600  | 2.0473   | 0.1835   | 0.8925  | 1.2962  | 4.0000  |
|    | 12.3588  | 1.2523  | 4.0000   | 21.7115  | 139.9309 | 4.6988  | 6.0000  | 0.0000  |
|    | -1.0000  | 0.0000  | 128.2031 | 8.7895   | 23.9298  | 0.8381  | 0.8563  | 0.0000  |
|    | -4.7525  | 2.1607  | 1.0338   | 4.0000   | 2.5791   | 0.0000  | 0.0000  | 0.0000  |
| Ca | 1.9927   | 2.0000  | 40.0870  | 2.7005   | 0.1848   | 0.7939  | 1.0000  | 2.0000  |
|    | 10.6123  | 27.5993 | 3.0000   | 38.0000  | 0.0000   | -1.9372 | 6.5275  | 0.0000  |
|    | -1.3000  | 0.0000  | 220.0000 | 49.9248  | 0.3370   | 0.0000  | 0.0000  | 0.0000  |
|    | -2.0000  | 4.0000  | 1.0564   | 6.2998   | 2.9663   | 1.4000  | 0.0100  | 13.0000 |
| Cs | 2.5411   | 1.0000  | 132.9054 | 2.1409   | 0.3507   | 0.9824  | -1.0000 | 1.0000  |
|    | 14.0000  | 2.5000  | 1.0000   | 0.0000   | 0.0000   | -4.1130 | 8.7265  | 0.0000  |
|    | -1.0000  | 0.0000  | 23.0445  | 100.0000 | 1.0000   | 0.0000  | 0.8563  | 0.0000  |
|    | -2.5000  | 3.9900  | 1.0338   | 8.0000   | 2.5791   | 1.0000  | 0.0100  | 13.0000 |
| K  | 2.1000   | 1.0000  | 39.0983  | 2.6480   | 0.1676   | 0.3343  | -1.0000 | 1.0000  |
|    | 9.0047   | 2.5000  | 1.0000   | 0.0000   | 0.0000   | -5.0000 | 10.4546 | 0.0000  |
|    | -1.0000  | 0.0000  | 23.0445  | 100.0000 | 1.0000   | 0.0000  | 0.8563  | 0.0000  |
|    | -2.5000  | 3.9900  | 1.0338   | 8.0000   | 2.5791   | 1.0000  | 0.0100  | 13.0000 |
| Sr | 2.1997   | 2.0000  | 87.6200  | 2.5141   | 0.3839   | 0.3983  | 1.0000  | 2.0000  |
|    | 11.1452  | 27.5993 | 3.0000   | 0.0000   | 0.0000   | -4.2868 | 6.5000  | 0.0000  |
|    | -1.3000  | 0.0000  | 220.0000 | 49.9248  | 0.3370   | 0.0000  | 0.0000  | 0.0000  |
|    | -25.0000 | 4.0000  | 1.0564   | 6.2998   | 2.9663   | 1.0000  | 0.1000  | 13.0000 |
| Na | 1.8000   | 1.0000  | 22.9898  | 2.8270   | 0.1872   | 0.4000  | -1.0000 | 1.0000  |
|    | 10.0000  | 2.5000  | 1.0000   | 0.0000   | 0.0000   | -0.9871 | 6.7728  | 0.0000  |

```

-1.0000 0.0000 23.0445 100.0000 1.0000 0.0000 0.8563 0.0000
-2.5000 3.9900 1.0338 8.0000 2.5791 0.0000 0.0000 0.0000
Mg 1.8278 2.0000 24.3050 2.2494 0.1830 0.4805 1.0000 2.0000
10.8448 4.4030 3.0000 38.0000 0.0000 0.1595 6.1918 0.0000
-1.3000 0.0000 34.5160 49.9248 0.3370 0.0000 0.0000 0.0000
-16.6849 2.3663 1.0564 6.0000 2.9663 0.0000 0.0000 0.0000
Al 2.1967 3.0000 26.9820 2.3738 0.2328 0.4873 -1.6836 3.0000
9.4002 2.6409 3.0000 0.0076 16.5151 -0.7626 6.4941 0.0000
-1.0000 0.0000 78.4675 20.0000 0.2500 0.0000 0.8563 0.0000
-23.1826 1.5000 1.0338 8.0000 2.5791 1.4000 0.2000 13.0000
Cu 1.9202 2.0000 63.5460 1.9221 0.2826 1.0000 0.1000 1.0000
10.9889 100.0000 1.0000 0.0000 0.0000 2.7875 6.0000 0.0000
-1.0000 0.0000 80.7000 34.9555 0.4988 0.0000 0.8563 0.0000
-5.1872 3.1491 1.0000 4.0000 2.5791 0.0000 0.0000 0.0000
X -0.1000 2.0000 1.0080 2.0000 0.0000 1.0000 -0.1000 6.0000
10.0000 2.5000 4.0000 0.0000 0.0000 8.5000 1.5000 0.0000
-0.1000 0.0000 127.6226 8.7410 13.3640 0.6690 0.9745 0.0000
-11.0000 2.7466 1.0338 6.2998 2.8793 0.0000 0.0000 0.0000
Ti 2.0254 4.0000 47.8800 2.2105 0.1574 0.6311 0.1000 4.0000
12.7041 16.6482 4.0000 0.1000 0.0000 -1.3647 6.8406 0.0000
-1.0000 0.0000 143.1770 27.6505 -0.0753 0.0064 0.8563 0.0000
-15.0000 3.8359 1.0338 12.0000 2.2632 0.0000 0.0000 0.0000
76 ! Nr of bonds; Edis1;LPpen;n.u.;pbe1;pbo5;13corr;pbo6
      pbe2;pbo3;pbo4;n.u.;pbo1;pbo2;ovcorr
1 1 158.2004 99.1897 78.0000 -0.7738 -0.4550 1.0000 37.6117 0.4147
      0.4590 -0.1000 9.1628 1.0000 -0.0777 6.7268 1.0000 0.0000
1 2 169.4760 0.0000 0.0000 -0.6083 0.0000 1.0000 6.0000 0.7652
      5.2290 1.0000 0.0000 1.0000 -0.0500 6.9136 0.0000 0.0000
2 2 153.3934 0.0000 0.0000 -0.4600 0.0000 1.0000 6.0000 0.7300
      6.2500 1.0000 0.0000 1.0000 -0.0790 6.0552 0.0000 0.0000
1 3 158.6946 107.4583 23.3136 -0.4240 -0.1743 1.0000 10.8209 1.0000

```



0.5322 -0.3113 7.0000 1.0000 -0.1447 5.2450 0.0000 0.0000  
 3 3 142.2858 145.0000 50.8293 0.2506 -0.1000 1.0000 29.7503 0.6051  
 0.3451 -0.1055 9.0000 1.0000 -0.1225 5.5000 1.0000 0.0000  
 1 4 134.1215 140.2179 79.9745 0.0163 -0.1428 1.0000 27.0617 0.2000  
 0.1387 -0.3681 7.1611 1.0000 -0.1000 5.0825 1.0000 0.0000  
 3 4 130.8596 169.4551 40.0000 0.3837 -0.1639 1.0000 35.0000 0.2000  
 1.0000 -0.3579 7.0004 1.0000 -0.1193 6.8773 1.0000 0.0000  
 4 4 157.9384 82.5526 152.5336 0.4010 -0.1034 1.0000 12.4261 0.5828  
 0.1578 -0.1509 11.9186 1.0000 -0.0861 5.4271 1.0000 0.0000  
 2 3 160.0000 0.0000 0.0000 -0.5725 0.0000 1.0000 6.0000 0.5626  
 1.1150 1.0000 0.0000 1.0000 -0.0920 4.2790 0.0000 0.0000  
 2 4 231.8173 0.0000 0.0000 -0.3364 0.0000 1.0000 6.0000 0.4402  
 8.8910 1.0000 0.0000 1.0000 -0.0327 6.5754 0.0000 0.0000  
 1 5 128.9942 74.5848 55.2528 0.1035 -0.5211 1.0000 18.9617 0.6000  
 0.2949 -0.2398 8.1175 1.0000 -0.1029 5.6731 1.0000 0.0000  
 2 5 151.5159 0.0000 0.0000 -0.4721 0.0000 1.0000 6.0000 0.6000  
 9.4366 1.0000 0.0000 1.0000 -0.0290 7.0050 1.0000 0.0000  
 3 5 0.0000 0.0000 0.0000 0.5563 -0.4038 1.0000 49.5611 0.6000  
 0.4259 -0.4577 12.7569 1.0000 -0.1100 7.1145 1.0000 0.0000  
 4 5 0.0000 0.0000 0.0000 0.4438 -0.2034 1.0000 40.3399 0.6000  
 0.3296 -0.3153 9.1227 1.0000 -0.1805 5.6864 1.0000 0.0000  
 5 5 96.1871 93.7006 68.6860 0.0955 -0.4781 1.0000 17.8574 0.6000  
 0.2723 -0.2373 9.7875 1.0000 -0.0950 6.4757 1.0000 0.0000  
 1 6 108.3910 95.0233 0.0000 0.1129 -0.5558 1.0000 17.2117 0.4568  
 0.2424 -0.2378 10.1163 1.0000 -0.1020 5.7156 1.0000 0.0000  
 2 6 250.0000 0.0000 0.0000 -0.7128 0.0000 1.0000 6.0000 0.1186  
 18.5790 1.0000 0.0000 1.0000 -0.0731 7.4983 0.0000 0.0000  
 3 6 272.8709 18.4462 0.0000 -0.6107 -0.3000 1.0000 36.0000 0.8270  
 10.2334 -0.5495 29.9954 1.0000 -0.1277 7.5863 1.0000 0.0000  
 4 6 119.7136 41.2405 43.3991 -0.2060 -0.3000 1.0000 36.0000 0.7957  
 0.8189 -0.2614 9.4060 1.0000 -0.1245 6.1856 1.0000 0.0000

6 6 78.0276 54.0531 30.0000 0.5398 -0.3000 1.0000 16.0000 0.0476  
 0.2865 -0.8055 7.1248 1.0000 -0.0681 8.6957 0.0000 0.0000  
 2 7 0.0000 0.0000 0.0000 -0.0203 -0.1418 1.0000 13.1260 0.0230  
 8.2136 -0.1310 0.0000 1.0000 -0.2692 6.4254 0.0000 24.4461  
 3 7 50.8757 0.0000 43.3991 1.0000 -0.3000 1.0000 36.0000 0.0025  
 0.7609 -0.2500 12.0000 1.0000 -0.0515 8.9041 1.0000 24.4461  
 5 7 0.0000 0.0000 0.0000 0.5000 -0.3000 1.0000 16.0000 0.5000  
 0.5000 -0.2500 15.0000 1.0000 -0.1000 9.0000 0.0000 0.0000  
 6 7 0.0000 0.0000 0.0000 0.5000 -0.3000 1.0000 16.0000 0.5000  
 0.5000 -0.2500 15.0000 1.0000 -0.1000 9.0000 0.0000 0.0000  
 7 7 36.9494 0.0000 0.0000 -0.0412 -0.2000 0.0000 16.0000 0.3233  
 0.3708 -0.2000 10.0000 1.0000 -0.0822 4.2104 0.0000 0.0000  
 2 8 0.0000 0.0000 0.0000 -0.0203 -0.1418 1.0000 13.1260 0.0230  
 8.2136 -0.1310 0.0000 1.0000 -0.2692 6.4254 0.0000 24.4461  
 3 8 20.2042 0.0000 43.0000 0.8725 -0.3000 1.0000 36.0000 0.9891  
 1.1717 -0.3500 25.0000 1.0000 -0.0535 7.4006 1.0000 0.0000  
 8 8 23.4317 0.0000 0.0000 0.0743 0.3000 0.0000 25.0000 0.5292  
 0.7716 -0.4000 12.0000 1.0000 -0.0584 4.5750 0.0000 0.0000  
 2 9 0.0000 0.0000 0.0000 -1.0000 -0.3000 1.0000 36.0000 0.7000  
 10.1151 -0.3500 25.0000 1.0000 -0.1053 8.2003 1.0000 0.0000  
 3 9 22.6146 0.0000 43.0000 0.6651 -0.3000 1.0000 36.0000 1.0000  
 0.9166 -0.3500 25.0000 1.0000 -0.0583 7.3861 1.0000 0.0000  
 9 9 22.6628 0.0000 0.0000 0.3272 0.3000 0.0000 25.0000 0.5944  
 0.9915 -0.4000 12.0000 1.0000 -0.0517 4.5075 0.0000 0.0000  
 2 10 0.0000 0.0000 0.0000 -0.0203 -0.1418 1.0000 13.1260 0.0230  
 8.2136 -0.1310 0.0000 1.0000 -0.2692 6.4254 0.0000 24.4461  
 3 10 40.0000 0.0000 43.3991 1.0000 -0.3000 1.0000 36.0000 1.0000  
 0.9111 -0.2500 12.0000 1.0000 -0.0746 8.2827 1.0000 24.4461  
 10 10 25.4008 0.0000 0.0000 0.2399 -0.2000 0.0000 16.0000 0.4158  
 0.5220 -0.2000 10.0000 1.0000 -0.0848 4.0000 0.0000 0.0000  
 4 7 0.0000 0.0000 0.0000 0.5000 -0.3000 1.0000 16.0000 0.5000



2 11 0.0000 0.0000 0.0000 -1.0000 -0.3000 1.0000 36.0000 0.7000  
 10.1151 -0.3500 25.0000 1.0000 -0.1053 8.2003 1.0000 0.0000  
 3 11 45.8933 0.0000 0.0000 -0.1511 -0.3000 1.0000 36.0000 0.3105  
 5.8448 -0.3500 25.0000 1.0000 -0.0659 7.9140 1.0000 0.0000  
 6 11 0.1000 0.0000 0.0000 0.2500 -0.5000 1.0000 35.0000 0.6000  
 0.5000 -0.5000 20.0000 1.0000 -0.2000 10.0000 1.0000 0.0000  
 11 11 60.0000 0.0000 0.0000 -0.3458 0.3000 0.0000 25.0000 0.2477  
 2.4578 -0.4000 12.0000 1.0000 -0.0513 4.5180 0.0000 0.0000  
 2 12 58.6896 0.0000 0.0000 -0.0203 -0.1418 1.0000 13.1260 0.0230  
 8.2136 -0.1310 0.0000 1.0000 -0.2692 6.4254 0.0000 24.4461  
 3 12 60.0341 0.0000 43.3991 1.0000 -0.3000 1.0000 36.0000 0.0038  
 1.0000 -0.2500 12.0000 1.0000 -0.0884 6.7572 1.0000 24.4461  
 12 12 27.2865 0.0000 0.0000 0.3694 -0.2000 0.0000 16.0000 0.2631  
 0.7983 -0.2000 10.0000 1.0000 -0.1135 4.5200 0.0000 0.0000  
 2 13 92.8579 0.0000 0.0000 -0.6528 -0.3000 0.0000 36.0000 0.1551  
 10.0663 -0.3500 25.0000 1.0000 -0.0842 7.1758 0.0000 0.0000  
 3 13 182.0654 0.0000 0.0000 -0.0920 -0.3000 0.0000 36.0000 0.1688  
 0.0010 -0.3500 25.0000 1.0000 -0.1959 6.0894 0.0000 0.0000  
 6 13 0.0000 0.0000 0.0000 1.0000 0.3000 0.0000 26.0000 1.0000  
 0.5000 0.0000 12.0000 1.0000 -0.2000 10.0000 0.0000 0.0000  
 7 13 0.0000 0.0000 0.0000 0.5000 -0.3000 1.0000 16.0000 0.5000  
 0.5000 -0.2500 15.0000 1.0000 -0.1000 9.0000 0.0000 0.0000  
 8 13 0.0000 0.0000 0.0000 0.5000 -0.3000 1.0000 16.0000 0.5000  
 0.5000 -0.2500 15.0000 1.0000 -0.1000 9.0000 0.0000 0.0000  
 9 13 0.0000 0.0000 0.0000 0.5000 -0.3000 1.0000 16.0000 0.5000  
 0.5000 -0.2500 15.0000 1.0000 -0.1000 9.0000 0.0000 0.0000  
 10 13 0.0000 0.0000 0.0000 0.5000 -0.3000 1.0000 16.0000 0.5000  
 0.5000 -0.2500 15.0000 1.0000 -0.1000 9.0000 0.0000 0.0000  
 11 13 0.0000 0.0000 0.0000 0.5000 -0.3000 1.0000 16.0000 0.5000  
 0.5000 -0.2500 15.0000 1.0000 -0.1000 9.0000 0.0000 0.0000  
 12 13 0.0000 0.0000 0.0000 0.5000 -0.3000 1.0000 16.0000 0.5000

0.5000 -0.2500 15.0000 1.0000 -0.1000 9.0000 0.0000 0.0000  
 13 13 34.0777 0.0000 0.0000 0.4832 -0.3000 0.0000 16.0000 0.5154  
 6.4631 -0.4197 14.3085 1.0000 -0.1463 6.1608 0.0000 0.0000  
 2 14 0.0000 0.0000 0.0000 0.2000 -0.1418 1.0000 13.1260 0.5000  
 0.5000 -0.2000 20.0000 1.0000 -0.1000 9.0000 0.0000 0.0000  
 3 14 81.4346 0.0000 0.0000 -0.1594 -0.3000 1.0000 36.0000 0.0025  
 0.2904 -0.2500 12.0000 1.0000 -0.0742 9.3638 0.0000 0.0000  
 14 14 73.6263 0.0000 0.0000 0.0209 -0.2000 0.0000 16.0000 0.3414  
 0.4703 -0.2000 15.0000 1.0000 -0.1319 5.9254 0.0000 0.0000  
 6 14 0.0000 0.0000 0.0000 1.0000 0.3000 0.0000 26.0000 1.0000  
 0.5000 -0.1000 12.0000 1.0000 -0.2000 25.0000 0.0000 0.0000  
 13 14 0.0000 0.0000 0.0000 1.0000 0.3000 0.0000 26.0000 1.0000  
 0.5000 -0.1000 12.0000 1.0000 -0.2000 10.0000 0.0000 0.0000  
 3 16 130.5629 37.6984 0.0000 0.9228 -0.3000 0.0000 36.0000 0.0850  
 0.1150 -0.2818 16.1571 1.0000 -0.1343 6.8264 0.0000 0.0000  
 16 16 80.1930 0.0000 0.0000 -0.8469 -0.2000 0.0000 16.0000 0.2022  
 0.7528 -0.1924 14.9725 1.0000 -0.0885 5.0000 0.0000 0.0000  
 13 16 0.0000 0.0000 0.0000 1.0000 0.3000 0.0000 26.0000 1.0000  
 0.5000 -0.1000 12.0000 1.0000 -0.2000 10.0000 0.0000 0.0000  
 14 16 0.0000 0.0000 0.0000 1.0000 0.3000 0.0000 26.0000 1.0000  
 0.5000 -0.1000 12.0000 1.0000 -0.2000 10.0000 0.0000 0.0000  
 44 ! Nr of off-diagonal terms; Ediss;Ro;gamma;rsigma;rpi;rpi2  
 1 2 0.1239 1.4004 9.8467 1.1210 -1.0000 -1.0000  
 2 3 0.0283 1.2885 10.9190 0.9215 -1.0000 -1.0000  
 2 4 0.1059 1.8290 9.7818 0.9598 -1.0000 -1.0000  
 1 3 0.1156 1.8520 9.8317 1.2854 1.1352 1.0706  
 1 4 0.1447 1.8766 9.7990 1.3436 1.1885 1.1363  
 3 4 0.1048 2.0003 10.1220 1.3173 1.1096 1.0206  
 1 6 0.0541 2.0811 13.5179 1.7778 1.5840 -1.0000  
 2 6 0.1659 1.4000 11.7054 1.3437 -1.0000 -1.0000  
 3 6 0.1330 2.0545 10.8315 1.7043 1.3773 -1.0000

4 6 0.1297 1.9384 10.9856 1.6175 1.4045 -1.0000  
1 5 0.1408 1.8161 9.9393 1.7986 1.3021 1.4031  
2 5 0.0895 1.6239 10.0104 1.4640 -1.0000 -1.0000  
1 7 0.1000 1.9000 11.5000 -1.0000 -1.0000 -1.0000  
2 7 0.0100 1.6000 13.2979 -1.0000 -1.0000 -1.0000  
3 7 0.0955 1.7587 11.9417 1.9052 -1.0000 -1.0000  
5 7 0.1000 1.9000 11.0000 -1.0000 -1.0000 -1.0000  
6 7 0.1000 1.9000 11.0000 -1.0000 -1.0000 -1.0000  
2 8 0.2961 1.7153 13.7662 -1.0000 -1.0000 -1.0000  
3 8 0.1924 1.7793 11.9109 1.9358 -1.0000 -1.0000  
2 9 0.3000 1.5647 13.3924 -1.0000 -1.0000 -1.0000  
3 9 0.1832 1.7503 12.6152 1.6986 -1.0000 -1.0000  
2 10 0.0274 1.6386 13.6906 0.0010 -1.0000 -1.0000  
3 10 0.2033 1.7974 11.2834 1.8164 -1.0000 -1.0000  
5 8 0.2500 1.9000 12.0000 -1.0000 -1.0000 -1.0000  
6 8 0.2500 1.9000 11.0000 -1.0000 -1.0000 -1.0000  
5 9 0.2500 2.1000 10.5000 -1.0000 -1.0000 -1.0000  
6 9 0.2500 2.1000 9.5000 -1.0000 -1.0000 -1.0000  
5 10 0.3000 2.2000 11.5000 -1.0000 -1.0000 -1.0000  
6 10 0.3000 2.2000 10.5000 -1.0000 -1.0000 -1.0000  
3 11 0.0825 1.5904 11.3396 1.5905 -1.0000 -1.0000  
6 11 0.1757 2.0409 13.7267 -1.0000 -1.0000 -1.0000  
2 12 0.0200 1.4000 9.0000 1.8670 -1.0000 -1.0000  
3 12 0.0702 1.7500 12.0414 1.4636 -1.0000 -1.0000  
6 12 0.1000 1.8500 11.0000 -1.0000 -1.0000 -1.0000  
2 13 0.0564 1.4937 12.0744 1.7276 -1.0000 -1.0000  
3 13 0.1960 1.8464 11.1461 1.5646 -1.0000 -1.0000  
6 13 0.0980 1.7870 10.6898 -1.0000 -1.0000 -1.0000  
2 14 0.0300 1.5200 12.5000 0.1000 -1.0000 -1.0000  
3 14 0.0348 1.7637 12.3562 1.7228 -1.0000 -1.0000  
13 14 0.0341 0.7870 9.0714 -1.0000 -1.0000 -1.0000

6 14 0.0650 1.3563 9.7035 -1.0000 -1.0000 -1.0000  
3 16 0.1200 1.8000 10.5000 1.6526 1.4718 -1.0000  
13 16 0.0341 0.7870 9.0714 -1.0000 -1.0000 -1.0000  
14 16 0.0341 0.7870 9.0714 -1.0000 -1.0000 -1.0000  
141 ! Nr of angles;at1;at2;at3;Thetao,o;ka;kb;pv1;pv2;val(bo)  
1 1 1 59.0573 30.7029 0.7606 0.0000 0.7180 6.2933 1.1244  
1 1 2 65.7758 14.5234 6.2481 0.0000 0.5665 0.0000 1.6255  
2 1 2 70.2607 25.2202 3.7312 0.0000 0.0050 0.0000 2.7500  
1 2 2 0.0000 0.0000 6.0000 0.0000 0.0000 0.0000 1.0400  
1 2 1 0.0000 3.4110 7.7350 0.0000 0.0000 0.0000 1.0400  
2 2 2 0.0000 27.9213 5.8635 0.0000 0.0000 0.0000 1.0400  
1 1 3 49.6811 7.1713 4.3889 0.0000 0.7171 10.2661 1.0463  
3 1 3 77.7473 40.1718 2.9802 -25.3063 1.6170 -46.1315 2.2503  
1 1 4 66.1305 12.4661 7.0000 0.0000 3.0000 50.0000 1.1880  
3 1 4 73.9544 12.4661 7.0000 0.0000 3.0000 0.0000 1.1880  
4 1 4 64.1581 12.4661 7.0000 0.0000 3.0000 0.0000 1.1880  
2 1 3 65.0000 13.8815 5.0583 0.0000 0.4985 0.0000 1.4900  
2 1 4 74.2929 31.0883 2.6184 0.0000 0.0755 0.0000 1.0500  
1 2 4 0.0000 0.0019 6.3000 0.0000 0.0000 0.0000 1.0400  
1 3 1 73.5312 44.7275 0.7354 0.0000 3.0000 0.0000 1.0684  
1 3 3 79.4761 36.3701 1.8943 0.0000 0.7351 67.6777 3.0000  
1 3 4 82.4890 31.4554 0.9953 0.0000 1.6310 0.0000 1.0783  
3 3 3 80.7324 30.4554 0.9953 0.0000 1.6310 50.0000 1.0783  
3 3 4 84.3637 31.4554 0.9953 0.0000 1.6310 0.0000 1.0783  
4 3 4 89.7071 31.4554 0.9953 0.0000 1.6310 0.0000 1.1519  
1 3 2 70.1880 20.9562 0.3864 0.0000 0.0050 0.0000 1.6924  
2 3 3 75.6935 50.0000 2.0000 0.0000 1.0000 0.0000 1.1680  
2 3 4 75.6201 18.7919 0.9833 0.0000 0.1218 0.0000 1.0500  
2 3 2 85.8000 9.8453 2.2720 0.0000 2.8635 0.0000 1.5800  
1 4 1 66.0330 22.0295 1.4442 0.0000 1.6777 0.0000 1.0500  
1 4 3 103.3204 33.0381 0.5787 0.0000 1.6777 0.0000 1.0500

|   |   |   |          |         |        |          |        |        |        |
|---|---|---|----------|---------|--------|----------|--------|--------|--------|
| 1 | 4 | 4 | 104.1335 | 8.6043  | 1.6495 | 0.0000   | 1.6777 | 0.0000 | 1.0500 |
| 3 | 4 | 3 | 74.1978  | 42.1786 | 1.7845 | -18.0069 | 1.6777 | 0.0000 | 1.0500 |
| 3 | 4 | 4 | 74.8600  | 43.7354 | 1.1572 | -0.9193  | 1.6777 | 0.0000 | 1.0500 |
| 4 | 4 | 4 | 75.0538  | 14.8267 | 5.2794 | 0.0000   | 1.6777 | 0.0000 | 1.0500 |
| 1 | 4 | 2 | 69.1106  | 25.5067 | 1.1003 | 0.0000   | 0.0222 | 0.0000 | 1.0369 |
| 2 | 4 | 3 | 81.3686  | 40.0712 | 2.2396 | 0.0000   | 0.0222 | 0.0000 | 1.0369 |
| 2 | 4 | 4 | 83.0104  | 43.4766 | 1.5328 | 0.0000   | 0.0222 | 0.0000 | 1.0500 |
| 2 | 4 | 2 | 70.8687  | 12.0168 | 5.0132 | 0.0000   | 0.0222 | 0.0000 | 1.1243 |
| 1 | 2 | 3 | 0.0000   | 25.0000 | 3.0000 | 0.0000   | 1.0000 | 0.0000 | 1.0400 |
| 1 | 2 | 4 | 0.0000   | 0.0019  | 6.0000 | 0.0000   | 0.0000 | 0.0000 | 1.0400 |
| 1 | 2 | 5 | 0.0000   | 0.0019  | 6.0000 | 0.0000   | 0.0000 | 0.0000 | 1.0400 |
| 3 | 2 | 3 | 0.0000   | 15.0000 | 2.8900 | 0.0000   | 0.0000 | 0.0000 | 2.8774 |
| 3 | 2 | 4 | 0.0000   | 0.0019  | 6.0000 | 0.0000   | 0.0000 | 0.0000 | 1.0400 |
| 4 | 2 | 4 | 0.0000   | 0.0019  | 6.0000 | 0.0000   | 0.0000 | 0.0000 | 1.0400 |
| 2 | 2 | 3 | 0.0000   | 8.5744  | 3.0000 | 0.0000   | 0.0000 | 0.0000 | 1.0421 |
| 2 | 2 | 4 | 0.0000   | 0.0019  | 6.0000 | 0.0000   | 0.0000 | 0.0000 | 1.0400 |
| 1 | 1 | 5 | 74.9397  | 25.0560 | 1.8787 | 0.1463   | 0.0559 | 0.0000 | 1.0400 |
| 1 | 5 | 1 | 86.9521  | 36.9951 | 2.0903 | 0.1463   | 0.0559 | 0.0000 | 1.0400 |
| 2 | 1 | 5 | 74.9397  | 25.0560 | 1.8787 | 0.0000   | 0.0000 | 0.0000 | 1.0400 |
| 1 | 5 | 2 | 86.1791  | 36.9951 | 2.0903 | 0.0000   | 0.0000 | 0.0000 | 1.0400 |
| 1 | 5 | 5 | 85.3644  | 36.9951 | 2.0903 | 0.1463   | 0.0559 | 0.0000 | 1.0400 |
| 2 | 5 | 2 | 93.1959  | 36.9951 | 2.0903 | 0.0000   | 0.0000 | 0.0000 | 1.0400 |
| 2 | 5 | 5 | 84.3331  | 36.9951 | 2.0903 | 0.0000   | 0.0000 | 0.0000 | 1.0400 |
| 6 | 6 | 6 | 71.0490  | 32.4076 | 1.2648 | 0.0000   | 0.0133 | 0.0000 | 1.2899 |
| 2 | 6 | 6 | 77.2616  | 5.0190  | 7.8944 | 0.0000   | 4.0000 | 0.0000 | 1.0400 |
| 2 | 6 | 2 | 75.7983  | 14.4132 | 2.8640 | 0.0000   | 4.0000 | 0.0000 | 1.0400 |
| 3 | 6 | 6 | 99.8997  | 26.6610 | 2.1237 | 0.0000   | 0.0100 | 0.0000 | 1.4341 |
| 2 | 6 | 3 | 73.6998  | 40.0000 | 1.8782 | 0.0000   | 4.0000 | 0.0000 | 1.1290 |
| 3 | 6 | 3 | 98.2184  | 38.9429 | 0.7727 | 0.0000   | 1.1658 | 0.0000 | 2.2641 |
| 6 | 3 | 6 | 39.2858  | 1.3068  | 5.6478 | 0.0000   | 3.8972 | 0.0000 | 3.0000 |
| 2 | 3 | 6 | 79.2126  | 4.8973  | 8.0000 | 0.0000   | 1.0859 | 0.0000 | 2.1209 |



|   |   |   |         |         |        |        |        |        |        |
|---|---|---|---------|---------|--------|--------|--------|--------|--------|
| 3 | 3 | 6 | 82.7397 | 32.1198 | 1.8862 | 0.0000 | 0.1058 | 0.0000 | 1.5443 |
| 2 | 2 | 6 | 0.0000  | 47.1300 | 6.0000 | 0.0000 | 1.6371 | 0.0000 | 1.0400 |
| 6 | 2 | 6 | 0.0000  | 27.4206 | 6.0000 | 0.0000 | 1.6371 | 0.0000 | 1.0400 |
| 3 | 2 | 6 | 0.0000  | 7.0550  | 3.9236 | 0.0000 | 1.6371 | 0.0000 | 1.0400 |
| 2 | 2 | 5 | 0.0000  | 0.0019  | 6.0000 | 0.0000 | 0.0000 | 0.0000 | 1.0400 |
| 1 | 1 | 6 | 72.5239 | 22.3583 | 2.0393 | 0.0000 | 1.0031 | 0.0000 | 1.0400 |
| 1 | 6 | 1 | 69.1709 | 18.9268 | 2.1226 | 0.0000 | 1.0031 | 0.0000 | 1.0400 |
| 6 | 1 | 6 | 68.6453 | 18.7377 | 2.0496 | 0.0000 | 1.0031 | 0.0000 | 1.0400 |
| 1 | 6 | 6 | 68.9902 | 19.7021 | 2.0587 | 0.0000 | 1.0031 | 0.0000 | 1.0400 |
| 2 | 1 | 6 | 72.6403 | 13.6964 | 2.4702 | 0.0000 | 1.0000 | 0.0000 | 1.0400 |
| 1 | 6 | 2 | 71.8708 | 14.6864 | 2.4702 | 0.0000 | 1.0000 | 0.0000 | 1.0400 |
| 4 | 6 | 6 | 60.6199 | 17.7559 | 1.0576 | 0.0000 | 2.1459 | 0.0000 | 1.0400 |
| 4 | 6 | 4 | 74.1294 | 20.6494 | 2.1244 | 0.0000 | 0.7689 | 0.0000 | 1.0400 |
| 3 | 6 | 4 | 57.0650 | 9.4985  | 0.3423 | 0.0000 | 0.7689 | 0.0000 | 1.0400 |
| 6 | 4 | 6 | 24.1137 | 1.7457  | 0.2198 | 0.0000 | 4.1125 | 0.0000 | 1.0400 |
| 2 | 6 | 4 | 68.7410 | 15.5851 | 1.8545 | 0.0000 | 0.8613 | 0.0000 | 1.0400 |
| 2 | 4 | 6 | 80.9040 | 4.0560  | 1.2284 | 0.0000 | 1.6982 | 0.0000 | 1.0400 |
| 4 | 4 | 6 | 60.0000 | 10.0000 | 0.7500 | 0.0000 | 1.0000 | 0.0000 | 1.0400 |
| 3 | 4 | 6 | 69.8728 | 32.7155 | 1.5875 | 0.0000 | 2.2466 | 0.0000 | 1.0400 |
| 4 | 3 | 6 | 69.8728 | 27.1273 | 1.5875 | 0.0000 | 2.2466 | 0.0000 | 1.0400 |
| 4 | 2 | 6 | 0.0000  | 31.0427 | 4.5625 | 0.0000 | 1.6371 | 0.0000 | 1.0400 |
| 1 | 3 | 6 | 85.8521 | 12.6881 | 1.0112 | 0.0000 | 1.0000 | 0.0000 | 1.3220 |
| 1 | 6 | 3 | 71.7524 | 35.8987 | 1.5000 | 0.0000 | 1.0000 | 0.0000 | 1.0487 |
| 3 | 1 | 6 | 70.0000 | 5.0250  | 1.0000 | 0.0000 | 1.0000 | 0.0000 | 1.2500 |
| 1 | 2 | 6 | 0.0000  | 2.5000  | 1.0000 | 0.0000 | 1.0000 | 0.0000 | 1.2500 |
| 3 | 7 | 3 | 1.0000  | 4.9611  | 2.4541 | 0.0000 | 0.5754 | 0.0000 | 1.0000 |
| 7 | 3 | 7 | 9.5066  | 4.2640  | 3.1438 | 0.0000 | 1.9819 | 0.0000 | 1.6463 |
| 2 | 3 | 7 | 51.3829 | 2.5000  | 0.2500 | 0.0000 | 0.0500 | 0.0000 | 1.0000 |
| 3 | 3 | 7 | 70.0000 | 25.0000 | 1.0000 | 0.0000 | 1.0000 | 0.0000 | 1.2500 |
| 3 | 8 | 3 | 45.7222 | 4.2175  | 3.5761 | 0.0000 | 0.6153 | 0.0000 | 2.3668 |
| 2 | 3 | 8 | 94.0770 | 2.0922  | 6.0000 | 0.0000 | 0.7307 | 0.0000 | 1.0135 |

8 3 8 75.6996 5.2610 3.9306 0.0000 1.9091 0.0000 1.1965  
3 9 3 100.0000 1.2360 6.8249 0.0000 3.2930 0.0000 1.0000  
2 3 9 100.0000 1.0007 9.7740 0.0000 1.4276 0.0000 1.0000  
9 3 9 98.5744 2.1499 1.6268 0.0000 3.7347 0.0000 2.8271  
3 10 3 40.5067 9.9705 4.0000 0.0000 0.0500 0.0000 1.5730  
10 3 10 40.0000 9.5071 4.0000 0.0000 3.7118 0.0000 1.4108  
2 3 10 81.1078 2.0823 5.0000 0.0000 0.7032 0.0000 1.0000  
3 3 10 70.0000 25.0000 1.0000 0.0000 1.0000 0.0000 1.2500  
5 3 7 40.0000 5.0000 2.0000 0.0000 1.0000 0.0000 1.2500  
6 3 7 30.0000 10.0000 2.0000 0.0000 1.0000 0.0000 1.2500  
5 3 8 40.0000 10.0000 2.0000 0.0000 1.0000 0.0000 1.2500  
6 3 8 30.0000 15.0000 2.0000 0.0000 1.0000 0.0000 1.2500  
5 3 9 40.0000 4.0000 2.0000 0.0000 1.0000 0.0000 1.2500  
6 3 9 30.0000 8.0000 2.0000 0.0000 1.0000 0.0000 1.2500  
5 3 10 40.0000 15.0000 2.0000 0.0000 1.0000 0.0000 1.2500  
6 3 10 30.0000 22.5000 2.0000 0.0000 1.0000 0.0000 1.2500  
2 12 2 0.0000 49.8261 0.2093 0.0000 2.0870 0.0000 2.2895  
2 2 12 0.0000 40.0366 3.1505 0.0000 1.1296 0.0000 1.1110  
12 2 12 0.0000 0.5047 0.8000 0.0000 0.8933 0.0000 4.6650  
2 12 12 0.0000 8.7037 0.0827 0.0000 3.5597 0.0000 1.1198  
3 12 3 16.6660 25.0000 1.4129 0.0000 0.3049 0.0000 1.2391  
12 3 12 58.7093 23.5645 8.1273 0.0000 3.9792 0.0000 1.6907  
2 3 12 47.5370 6.3596 2.6766 0.0000 2.7588 0.0000 2.6720  
2 12 3 0.0000 35.0000 0.3447 0.0000 1.0000 0.0000 1.9494  
3 3 12 70.0000 20.0000 1.0000 0.0000 1.0000 0.0000 1.2500  
6 3 12 30.0000 10.0000 2.0000 0.0000 1.0000 0.0000 1.2500  
3 2 13 0.0000 4.2750 1.0250 0.0000 1.3750 0.0000 1.4750  
2 2 13 0.0000 3.0000 1.0000 0.0000 1.0000 0.0000 1.2500  
13 2 13 0.0000 20.2391 0.1328 0.0000 2.9860 0.0000 1.0870  
2 3 13 88.6163 10.1310 1.6896 0.0000 3.0000 0.0000 1.0000  
3 3 13 34.4326 25.9544 5.1239 0.0000 2.7500 0.0000 1.7141

13 3 13 13.8580 12.3669 4.4355 0.0000 0.6619 0.0000 1.1908  
2 13 2 67.4229 4.5148 5.9702 0.0000 3.0000 0.0000 2.6879  
2 13 3 41.8108 17.3800 2.6618 0.0000 0.7372 0.0000 1.0100  
3 13 3 55.4358 22.1089 3.7402 0.0000 3.0000 0.0000 2.2064  
3 13 13 32.1032 2.3304 4.5935 0.0000 0.5894 0.0000 1.0140  
2 13 13 180.0000 -26.7860 7.3549 0.0000 1.0000 0.0000 1.0252  
2 13 13 78.2279 37.6504 0.4809 0.0000 1.0000 0.0000 2.9475  
6 3 13 7.1670 11.9291 3.9535 0.0000 1.0000 0.0000 3.4258  
3 14 3 96.2265 4.5610 12.0000 0.0000 0.3211 0.0000 1.5204  
3 14 3 0.0000 9.1552 7.9919 0.0000 0.1660 0.0000 1.5386  
14 3 14 100.0000 10.1065 6.0000 0.0000 1.0000 0.0000 3.6601  
2 3 14 55.0417 3.5032 3.9979 0.0000 1.5171 0.0000 1.0400  
3 3 14 70.0000 30.0000 2.0000 0.0000 1.0000 0.0000 1.2500  
3 14 14 66.7783 14.3146 0.7911 0.0000 1.0000 0.0000 1.2333  
13 3 14 68.0314 6.5925 10.1832 0.0000 3.3231 0.0000 0.8395  
6 3 14 113.9913 7.3197 0.3892 0.0000 3.2258 0.0000 1.1530  
3 16 3 90.0000 30.4624 2.1468 0.0000 0.0500 0.0000 1.9485  
16 3 16 90.0000 5.7486 5.0000 0.0000 2.0000 0.0000 1.1000  
3 3 16 62.9344 15.0215 4.3743 0.0000 0.6168 0.0000 1.1673  
3 16 16 33.7127 8.0623 3.4580 0.0000 0.0500 0.0000 2.6065  
13 3 16 68.0314 6.5925 10.1832 0.0000 3.3231 0.0000 0.8395  
14 3 16 68.0314 6.5925 10.1832 0.0000 3.3231 0.0000 0.8395  
42 ! Nr of torsions;at1;at2;at3;at4;;V1;V2;V3;V2(BO);vconj;n.u;n  
1 1 1 1 -0.2500 34.7453 0.0288 -6.3507 -1.6000 0.0000 0.0000  
1 1 1 2 -0.2500 29.2131 0.2945 -4.9581 -2.1802 0.0000 0.0000  
2 1 1 2 -0.2500 31.2081 0.4539 -4.8923 -2.2677 0.0000 0.0000  
1 1 1 3 -0.3495 22.2142 -0.2959 -2.5000 -1.9066 0.0000 0.0000  
2 1 1 3 0.0646 24.3195 0.6259 -3.9603 -1.0000 0.0000 0.0000  
3 1 1 3 -0.5456 5.5756 0.8433 -5.1924 -1.0180 0.0000 0.0000  
1 1 3 1 1.7555 27.9267 0.0072 -2.6533 -1.0000 0.0000 0.0000  
1 1 3 2 -1.4358 36.7830 -1.0000 -8.1821 -1.0000 0.0000 0.0000

2 1 3 1 -1.3959 34.5053 0.7200 -2.5714 -2.1641 0.0000 0.0000  
 2 1 3 2 -2.5000 70.0597 1.0000 -3.5539 -2.9929 0.0000 0.0000  
 1 1 3 3 0.6852 11.2819 -0.4784 -2.5000 -2.1085 0.0000 0.0000  
 2 1 3 3 0.1933 80.0000 1.0000 -4.0590 -3.0000 0.0000 0.0000  
 3 1 3 1 -1.9889 76.4820 -0.1796 -3.8301 -3.0000 0.0000 0.0000  
 3 1 3 2 0.2160 72.7707 -0.7087 -4.2100 -3.0000 0.0000 0.0000  
 3 1 3 3 -2.5000 71.0772 0.2542 -3.1631 -3.0000 0.0000 0.0000  
 1 3 3 1 2.5000 -0.6002 1.0000 -3.4297 -2.8858 0.0000 0.0000  
 1 3 3 2 -2.5000 -3.3822 0.7004 -5.4467 -2.9586 0.0000 0.0000  
 2 3 3 2 2.5000 -4.0000 0.9000 -2.5000 -1.0000 0.0000 0.0000  
 1 3 3 3 1.2329 -4.0000 1.0000 -2.5000 -1.7479 0.0000 0.0000  
 2 3 3 3 0.8302 -4.0000 -0.7763 -2.5000 -1.0000 0.0000 0.0000  
 3 3 3 3 -2.5000 -4.0000 1.0000 -2.5000 -1.0000 0.0000 0.0000  
 0 1 2 0 0.0000 0.0000 0.0000 0.0000 0.0000 0.0000 0.0000  
 0 2 2 0 0.0000 0.0000 0.0000 0.0000 0.0000 0.0000 0.0000  
 0 2 3 0 0.0000 0.1000 0.0200 -2.5415 0.0000 0.0000 0.0000  
 0 1 1 0 0.0000 50.0000 0.3000 -4.0000 -2.0000 0.0000 0.0000  
 0 3 3 0 0.5511 25.4150 1.1330 -5.1903 -1.0000 0.0000 0.0000  
 0 1 4 0 -2.4242 128.1636 0.3739 -6.6098 -2.0000 0.0000 0.0000  
 0 2 4 0 0.0000 0.1000 0.0200 -2.5415 0.0000 0.0000 0.0000  
 0 3 4 0 1.4816 55.6641 0.0004 -7.0465 -2.7203 0.0000 0.0000  
 0 4 4 0 -0.3244 27.7086 0.0039 -2.8272 -2.0000 0.0000 0.0000  
 4 1 4 4 -5.5181 8.9706 0.0004 -6.1782 -2.0000 0.0000 0.0000  
 0 1 5 0 3.3423 30.3435 0.0365 -2.7171 0.0000 0.0000 0.0000  
 0 5 5 0 -0.0555 -42.7738 0.1515 -2.2056 0.0000 0.0000 0.0000  
 0 2 5 0 0.0000 0.0000 0.0000 0.0000 0.0000 0.0000 0.0000  
 2 6 6 2 0.0000 0.0000 0.0640 -2.4426 0.0000 0.0000 0.0000  
 2 6 6 6 0.0000 0.0000 0.1587 -2.4426 0.0000 0.0000 0.0000  
 0 2 6 0 0.0000 0.0000 0.1200 -2.4847 0.0000 0.0000 0.0000  
 0 4 6 0 0.0000 0.0000 0.0000 -2.4426 0.0000 0.0000 0.0000  
 1 1 3 3 -2.0000 73.0530 1.5000 -9.0000 -2.0000 0.0000 0.0000

1 3 3 1 0.0002 80.0000 -1.5000 -2.5000 -2.0000 0.0000 0.0000  
3 1 3 3 -1.8835 20.0000 1.5000 -9.0000 -2.0000 0.0000 0.0000  
2 3 14 3 -1.5000 6.8333 -0.1978 -1.4683 0.0000 0.0000 0.0000  
1 ! Nr of hydrogen bonds;at1;at2;at3;Rhb;Dehb;vhb1  
3 2 3 2.1200 -3.5800 1.4500 19.5000
